# Supplementary material for: Carbon dots boost nitrate-to-ammonia conversion via hydrogen evolution control in CDs/Ag nanocomposites
Source: Royal Society of Chemistry journal article supplement (doi:10.1039/d4cc05246c), 2024-01-01
Supplement: d4cc05246c1.pdf [file d4cc05246c1.pdf]

## Supporting Information

### Carbon dots boost nitrate-to-ammonia conversion via hydrogen evolution control in CDs/Ag nanocomposites

Chan Wang<sup>a</sup>, Huan Zhuo<sup>a</sup>, Wenchao Zhang<sup>b</sup>, Dongliang Xiang<sup>c</sup>, Jiace Hao<sup>a</sup>, Qijun Song<sup>a</sup>, Han Zhu<sup>\*a</sup>

- a. Key Laboratory of Synthetic and Biological Colloids, Ministry of Education, School of Chemical and Material Engineering, Jiangnan University, Wuxi, Jiangsu 214122, P. R. China. E-mail: zhysw@jiangnan.edu.cn.
- b. School of Chemistry and Life Sciences, Suzhou University of Science and Technology, Suzhou, 215009, Jiangsu, P. R. China.
- c. Jiangsu Snow Leopard Daily Chemical Co. Ltd, Wuxi, Jiangsu, 214400, P. R. China.

#### 1. Experimental Section

##### 1.1. Materials

Catechol, urea, N,N-dimethylformamide (DMF), silver nitrate (AgNO<sub>3</sub>), polyvinylpyrrolidone (PVP), ethanol (C<sub>2</sub>H<sub>5</sub>OH), potassium hydroxide (KOH), potassium nitrate (KNO<sub>3</sub>), potassium nitrite (KNO<sub>2</sub>), sodium hydroxide (NaOH), sodium citrate dihydrate, salicylic acid, 4-aminobenzenesulfonamide, hydrochloric acid (HCl), N-(1-naphthyl) ethylenediamine dihydrochloride and ammonium chloride (NH<sub>4</sub>Cl) were purchased from Sinopharm Chemical Reagent Co., Ltd. Sodium hypochlorite pentahydrate (NaClO·5H<sub>2</sub>O), sodium nitroferricyanide dehydrate (C<sub>5</sub>FeN<sub>5</sub>Na<sub>2</sub>O·2H<sub>2</sub>O) and potassium nitrate-<sup>15</sup>N (K<sup>15</sup>NO<sub>3</sub>) were purchased from Macklin Co., Ltd. Dimethyl sulfoxide (DMSO) was obtained from Cambridge Isotope Laboratories, Inc. 4-Dimethylaminobenzaldehyde (C<sub>9</sub>H<sub>11</sub>NO) was acquired by Sigma-Aldrich. All chemical reagents were analytic grades and used without further purification. Argon (Ar, 99.999 %) were bought from Xinxiyi Technology Co., Ltd (Jiangsu, China). Ultrapure water was used to prepare the aqueous solution. The anion exchange membrane (FAA-3-PK-130) was purchased from Suzhou Sinero Technology Co., Ltd.

##### 1.2. Preparation of catalysts

###### 1.2.1. Preparation of CDs

1 g of catechol and 0.33 g of urea were weighed respectively, dissolved in 10 mL of deionized water, mixed well and poured into a 25 mL polytetrafluoroethylene reactor, and kept warm at 200 °C for 6 h. At the end of the reaction, after the reactor was cooled down to room temperature, the synthesized solution was dialyzed with a dialysis bag of 1000 Da for 24 h (with the water changed once every 12 h). After dialysis, the solid powder of CDs was obtained by freeze-drying.

###### 1.2.2. Preparation of CDs/Ag

CDs/Ag was synthesized by using a slight modification of a previous report. Briefly, 14.3 mg

of AgNO<sub>3</sub>, 250 mg of PVP and 10 mg of CDs were dissolved in 8 mL of DMF, sonicated until completely dissolved, and then poured into a 25 mL reactor, which was kept warm at 150 °C for 5 h. When the reaction was finished, it was centrifuged and alcohol washed and dried to obtain CDs/Ag. Without the addition of CDs, the same steps were synthesized for the comparison sample AgNPs.

The synthesis method of CDs/Ag-5/15 is similar to CDs/Ag, except for the different amounts of CDs, which are 5 mg and 15 mg, respectively.

### 1.3. Characterization

Scanning electron microscopy (SEM) and transmission electron microscopy (TEM) images were captured by Hitachi S-4800 FE - SEM and JEOL JEM 2100 Olus electron microscope (Japan Electron Optics Laboratory Co., Ltd.). High-angle annular dark-field scanning transmission electron microscopy (HAADF - STEM) and energy dispersive X-ray analysis were performed on a FEI ThemisZ. Powder X-ray diffraction (XRD) data was obtained using Bruker D8 Advance X-ray diffractometer. The diffraction patterns from 10° to 90° were recorded in steps of 0.05°/s. X-ray photoelectron spectroscopy (XPS) measurements were carried out on Axis Supra electron spectrometer (Shimadzu, Japan) using Al K $\alpha$  radiation of 600 W. Fourier-transform infrared (FT - IR) spectra were obtained by Nicolet 6700 spectrograph (Thermo Fisher Scientific, America). Thermogravimetric analysis (TGA) was performed using Mettler Toledo TGA 1100SF thermogravimetric analyzer (Mettler Toledo, Switzerland). The ultraviolet-visible (UV - Vis) absorbance spectra were measured on PERSEE TU-1950.

### 1.4. Electrochemical measurements

Electrochemical measurements were carried out at room temperature in a H-type electrolytic cell separated by an anion exchange membrane. The electrochemical responses were recorded using an Autolab electrochemical workstation. Carbon paper loaded with catalyst, Hg/HgO electrode and platinum mesh were used as working electrode, reference electrode and counter electrode, respectively. All potentials in this study were measured based on the Hg/HgO electrode and converted to the RHE reference scale by  $E \text{ (V vs RHE)} = E \text{ (V vs Hg/HgO)} + 0.0591 \text{ pH} + 0.098$ . The working electrode was prepared as follows: 1 mg of CDs/Ag catalyst powder, 100  $\mu\text{l}$  of ethanol, 5  $\mu\text{l}$  of Nafion solution (Sigma Aldrich, 5 wt%) were mixed and ultrasound for at least 30 minutes to form a homogeneous ink. Then we used spray gun to spray the catalyst ink onto 1 cm  $\times$  1 cm carbon paper. For electrocatalytic NO<sub>3</sub><sup>-</sup> reduction, solution containing 0.1 M KOH and 0.1 M KNO<sub>3</sub> was used as the electrolyte, unless otherwise stated, and uniformly distributed into the cathode and anode chambers. The electrolyte volume in both parts of the H-cell was 40 mL, and the electrolyte was purged with high-purity Ar prior to the measurements. The LSV was carried out at a scan rate of 5 mV/s. The potential-static test was performed at different potentials for 1 h. During the experiment, high-purity Ar was continuously injected into the cathode chamber. After electrolysis, the electrolyte was analyzed by UV-Vis spectrophotometry. Then, the next cycle of constant potential test was performed under the same conditions using fresh electrolyte.

### 1.5. Calculation of Faradaic efficiency and yield rate of NH<sub>3</sub>

The yield rate of NH<sub>3</sub> ( $Y_{\text{NH}_3}$ ) can be calculated using the following formula:  $Y_{\text{NH}_3} = (C_{\text{NH}_3} \times V) / (A \times t)$ . The Faraday efficiency of NH<sub>3</sub> ( $FE_{\text{NH}_3}$ ) is the percentage of the charge consumed for NH<sub>3</sub> generation in the total charge and is calculated according to the following formula:  $FE_{\text{NH}_3} = (8 \times F \times C_{\text{NH}_3} \times V) / Q$ , where  $C_{\text{NH}_3}$  is the measured concentration of NH<sub>3</sub> ( $\mu\text{mol/mL}$ ),  $V$  is the volume of the electrolyte (40 mL);  $t$  is the electrolysis time (1 h);  $A$  is the geometric area of the electrode (1 cm<sup>2</sup>);

F is the Faraday constant (96485 C/mol); and Q (C) is the total charge passing through the electrode and is the integral of the chronoamperometry curve.

#### 1.6. Determination of NH<sub>3</sub>

The concentration of NH<sub>3</sub> product was spectrophotometrically detected by the standard indophenol blue indicator method. Briefly, 2 mL diluted electrolyte, 2 mL solution A (1 M NaOH solution with 5 wt% sodium citrate and 5 wt% salicylic acid), 1 mL 0.05 M NaClO and 0.2 mL 1 wt% sodium nitroferricyanide (III) dihydrate (C<sub>5</sub>FeN<sub>6</sub>Na<sub>2</sub>O·2H<sub>2</sub>O) solution were mixed. After standing in the dark for 2 h, the absorption intensity at a wavelength of 655 nm was recorded by UV-Vis. For the quantitative determination of the amount of NH<sub>3</sub>, a series of standard NH<sub>4</sub>Cl solutions were used to calibrate the concentration-absorbance standard curve.

#### 1.7. Determination of NO<sub>2</sub><sup>-</sup>

First, 0.5 g of 4-aminobenzenesulfonamide was added to 50 mL of 10 wt % hydrochloric acid aqueous solution as color developer B, and 1 g/L of N-(1-naphthalenyl) ethylenediamine dihydrochloride aqueous solution as color developer C. Then, 100 μL color developer B and 100 μL color developer C were respectively added to 2 mL diluted electrolyte. After standing for 20 min, the absorption intensity at a wavelength of 540 nm was recorded by UV-Vis. For the quantitative of the amount of NO<sub>2</sub><sup>-</sup>, a series of standard KNO<sub>2</sub> solutions were used to calibrate the concentration-absorbance standard curve.

#### 1.8. Determination of NO<sub>3</sub><sup>-</sup>

First, 50 μL of electrolyte was taken out from the cathode chamber and diluted to 5 mL. Then, 1 mL 1 M HCl and 0.1 mL sulfamic acid solution (0.8 wt%) were added to the above solution. After standing for 30 min, the absorption intensity at wavelengths of 220 nm and 275 nm were recorded by UV-Vis. Calculate the final absorbance value using the following equation:  $A = A_{220\text{nm}} - 2A_{275\text{nm}}$ . For the quantitative of the amount of NO<sub>3</sub><sup>-</sup>, a series of standard KNO<sub>3</sub> solutions were used to calibrate the concentration-absorbance standard curve.

#### 1.9. <sup>14</sup>N and <sup>15</sup>N <sup>1</sup>H NMR measurements

<sup>1</sup>H NMR was recorded on an AVANCE III HD 400 MHz system. After chronoamperometry measurements using K<sup>14</sup>NO<sub>3</sub> - <sup>14</sup>N and K<sup>15</sup>NO<sub>3</sub> - <sup>15</sup>N as nitrogen source in electrolyte respectively, 500 μL electrolyte was taken out, and 150 μL 1 M H<sub>2</sub>SO<sub>4</sub> solution was added to adjust the pH, and 50 μL DMSO quantified by <sup>1</sup>H NMR at 400 Hz.

#### 1.10. In situ Raman spectroscopy

In situ Raman measurements were performed jointly by the Raman microscope (Renishaw Trading Company Ltd, λ excited = 532 nm) and a CHI 660 electrochemical workstation. A home-made electrolyzer with Ag/AgCl electrode and platinum wire as the counter and reference electrode respectively was used to measure. The test was performed over a range of 800~2000 cm<sup>-1</sup> during the chronoamperometry measurements from 0.21 V to -0.58 V vs RHE, and the dwell time at each potential was 3 minutes.

#### 1.11. In situ FT-IR spectroscopy

In situ FT-IR measurements were performed jointly by the FT-IR microscope (Nicolet iS50) and a CHI 660 electrochemical workstation. Electrocatalytic nitrate reduction to ammonia was carried out in an electrolyte of 0.1 M KOH + 0.1 M KNO<sub>3</sub>. After deducting the background, the in situ FT-IR spectra were measured from -0.57 V to -1.07 V vs RHE.

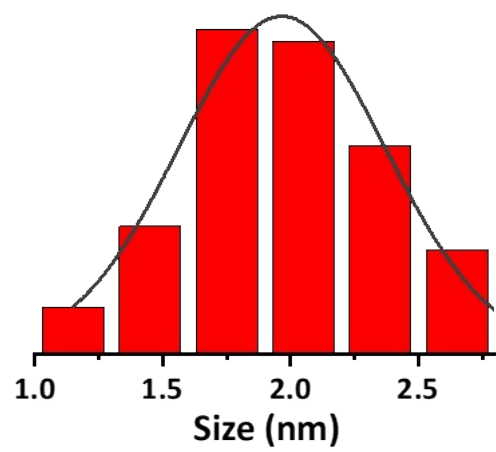

**Figure S1.** Size distribution histogram of CDs.

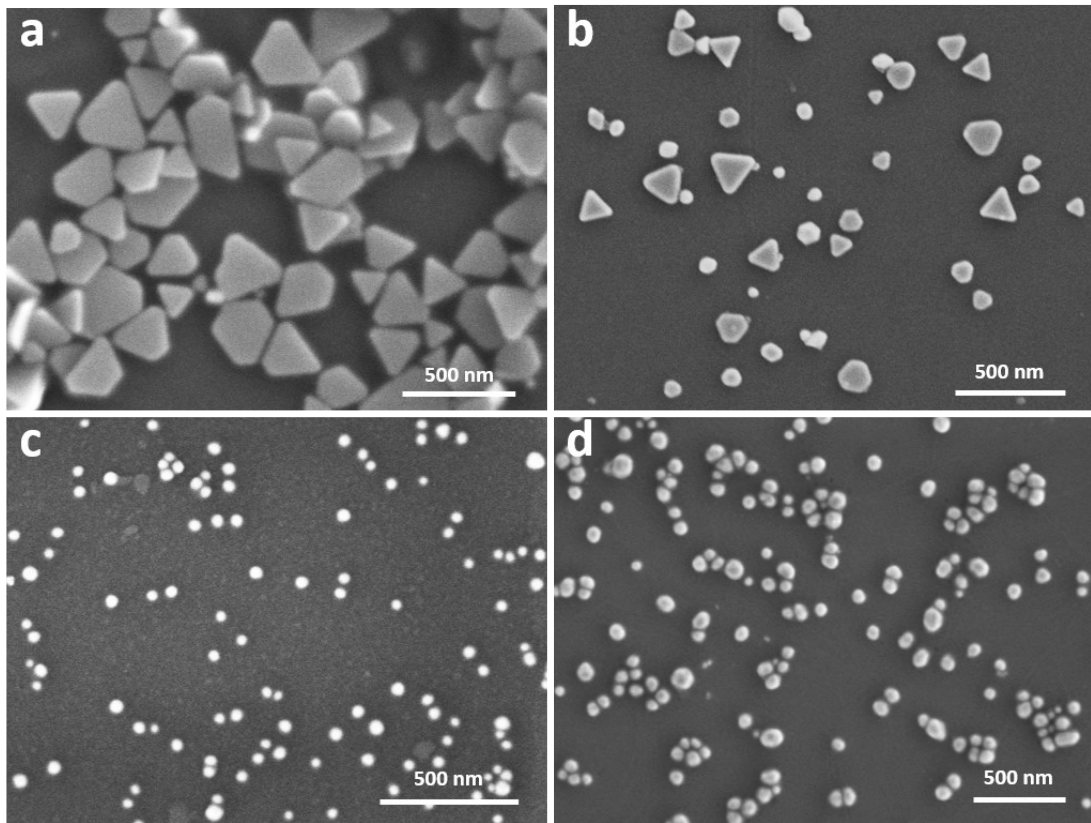

**Figure S2.** SEM images of prepared AgNPs, CDs/Ag-5, CDs/Ag and CDs/Ag-15.

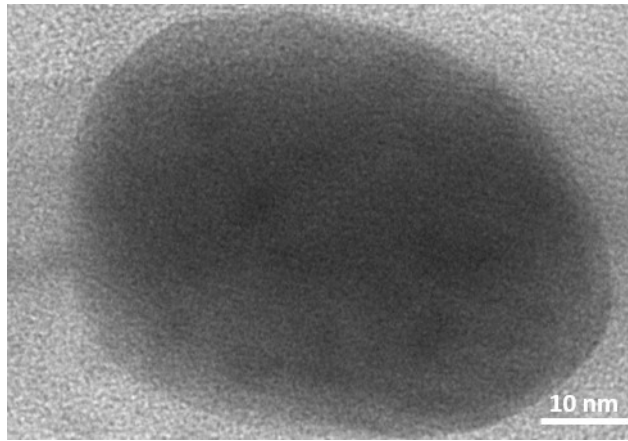

**Figure S3.** TEM image of prepared CDs/Ag.

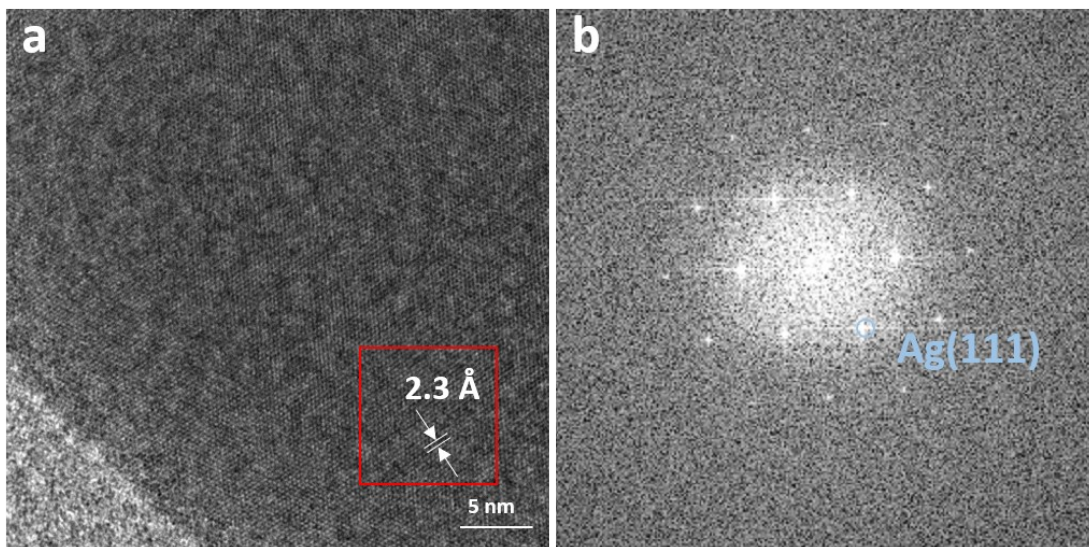

**Figure S4.** (a) HRTEM image and (b) the corresponding FFT pattern of Ag NPs.

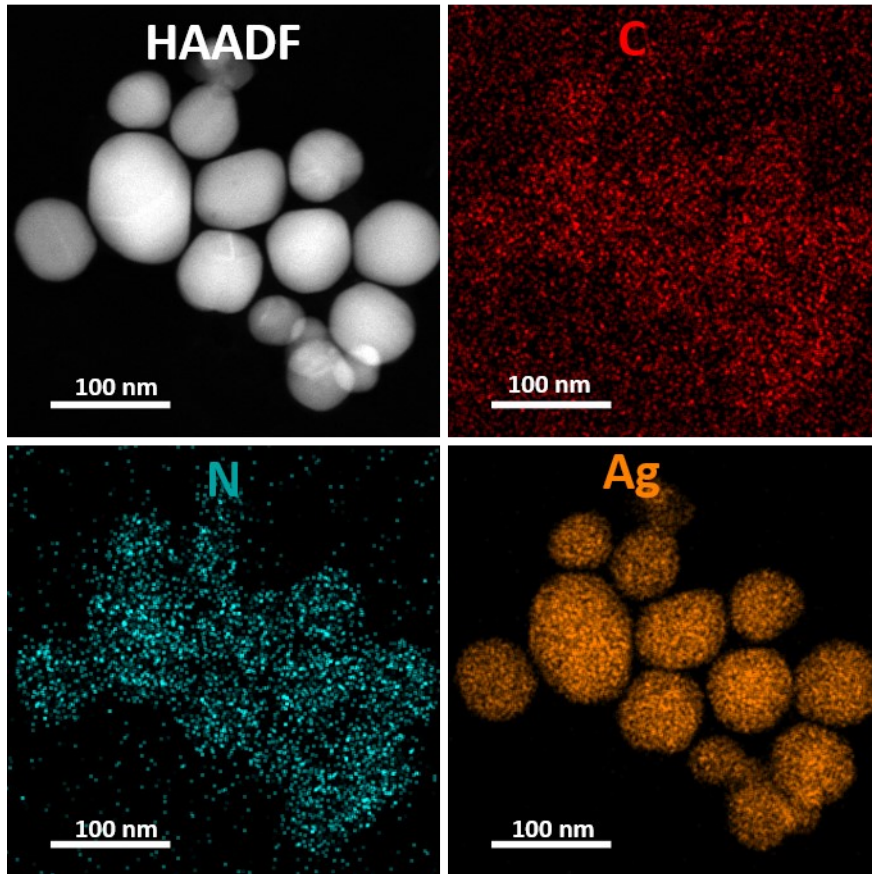

Figure S5. STEM-EDX mapping images of CDs/Ag in large field of view.



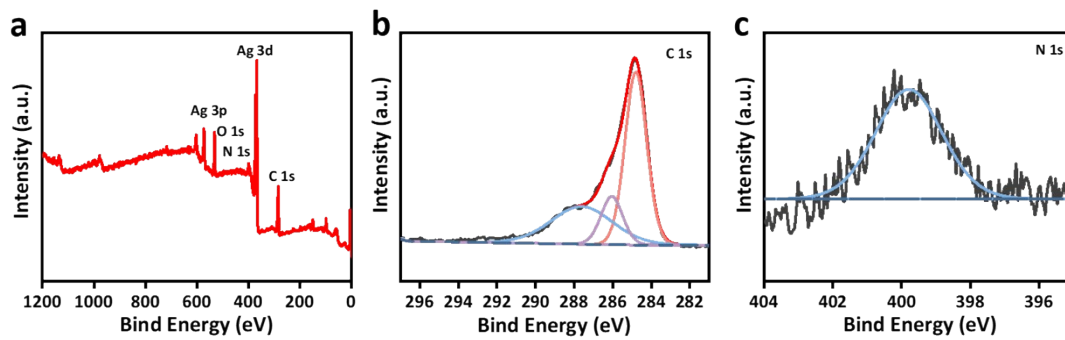

**Figure S6.** (a) XPS survey spectra, (b) C 1s and (c) N 1s XPS spectrum of CDs/Ag.

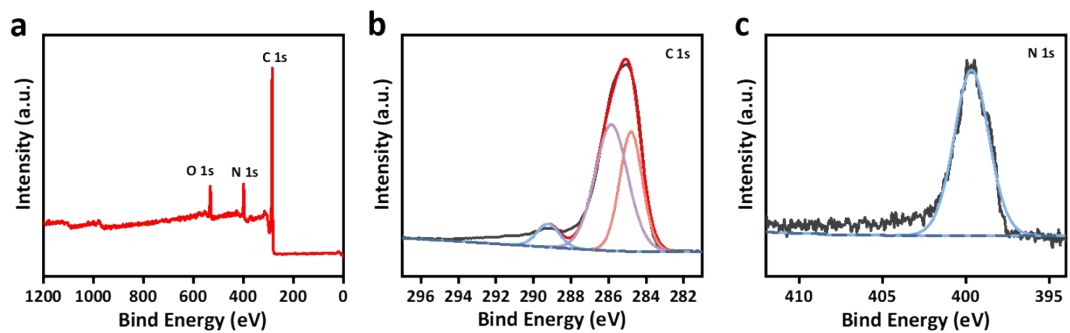

**Figure S7.** (a) XPS survey spectra, (b) C 1s and (c) N 1s XPS spectrum of CDs.

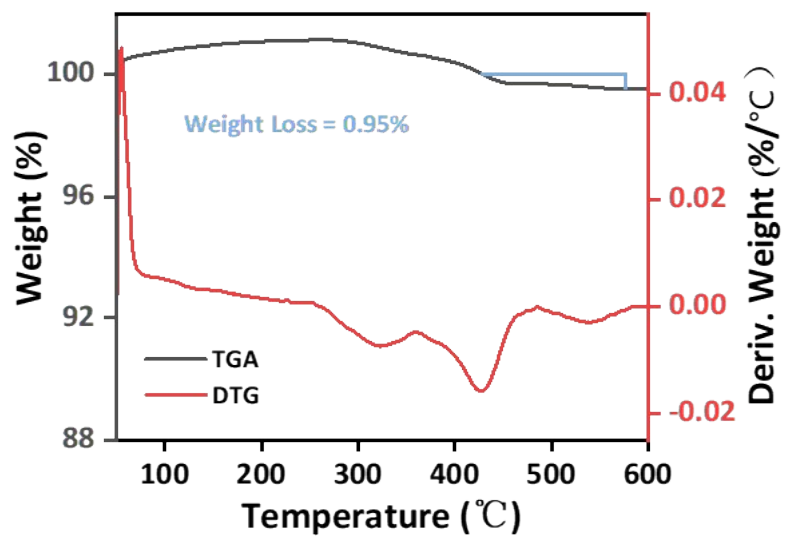

Figure S8. TGA and DTG curve of Ag NPs.

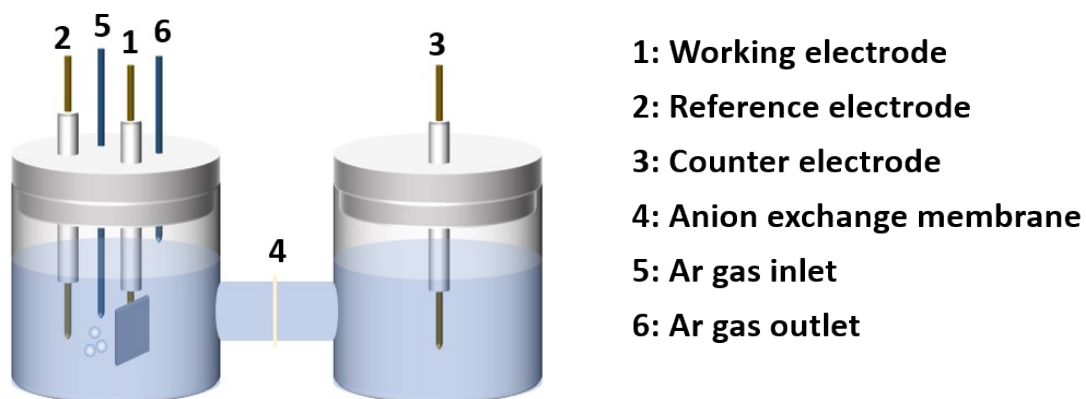

**Figure S9.** H-cell electrolytic cell for  $\text{NO}_3\text{RR}$ .

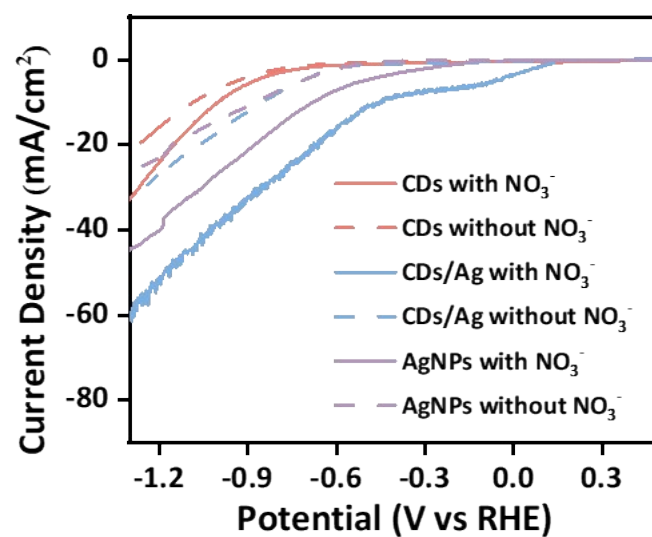

**Figure S10.** LSV curves of CDs, AgNPs and CDs/Ag in 0.1 M KOH with and without 0.1 M KNO<sub>3</sub>.

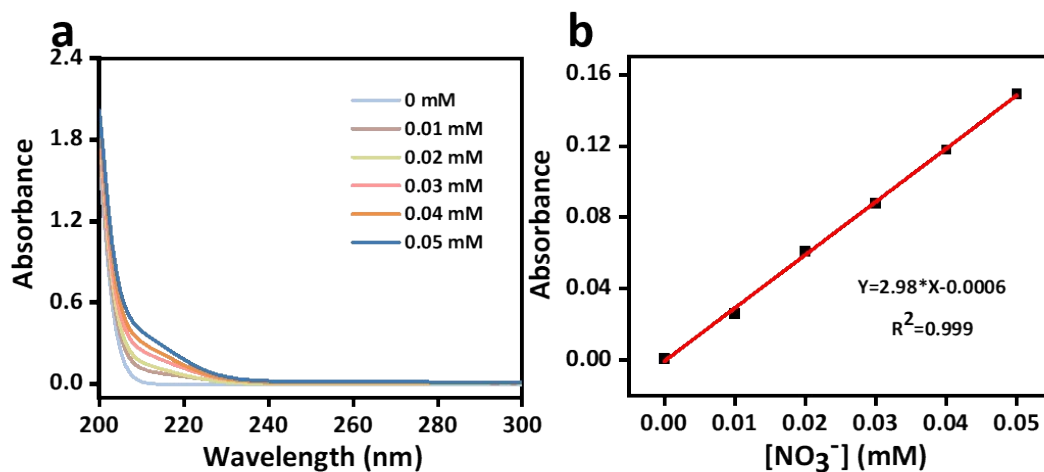

**Figure S11.** (a) The ultraviolet-visible absorption spectra of KNO<sub>3</sub> solution with different NO<sub>3</sub><sup>-</sup> concentrations. (b) The linear standard curve for the calculation of NO<sub>3</sub><sup>-</sup>.

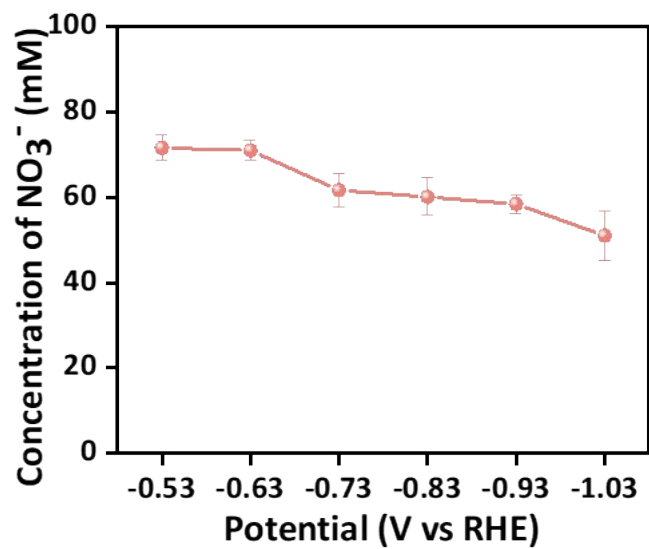

**Figure S12.** The concentration and conversion of  $\text{NO}_3^-$  over CDs/Ag ranging from -0.53 to -1.03 V vs RHE.

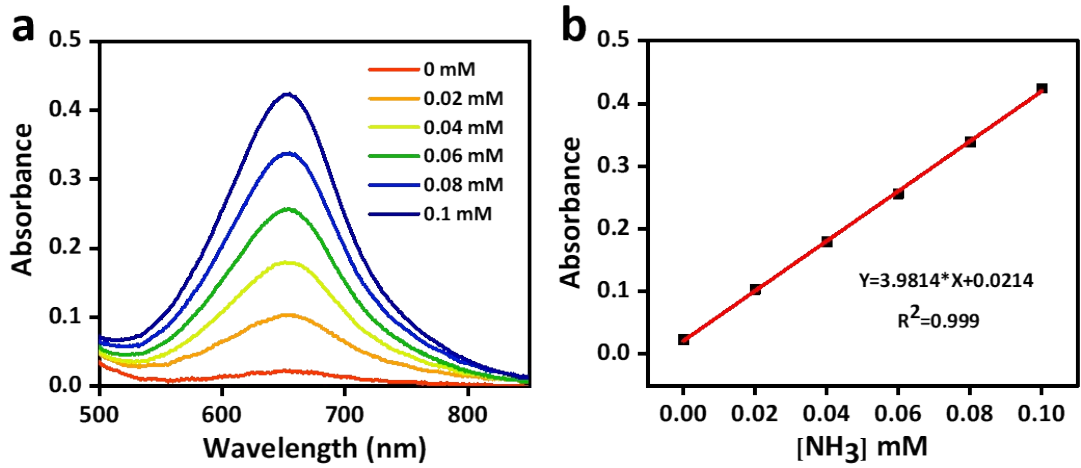

**Figure S13.** (a) The ultraviolet-visible absorption spectra of  $\text{NH}_4\text{Cl}$  solution with different ammonia concentrations. (b) The linear standard curve for the calculation of ammonia production.



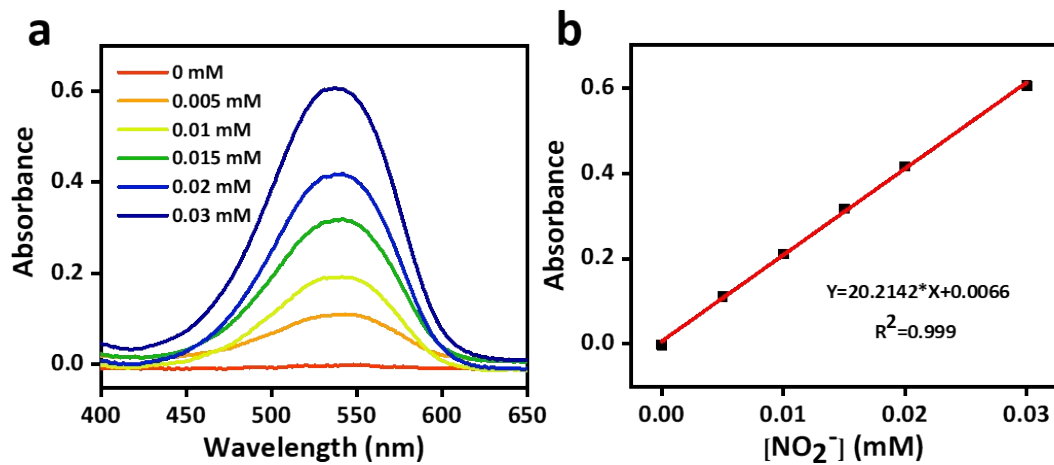

**Figure S14.** (a) The ultraviolet-visible absorption spectra of KNO<sub>2</sub> solution with different concentrations. (b) The linear standard curve for the calculation of NO<sub>2</sub><sup>-</sup> production.

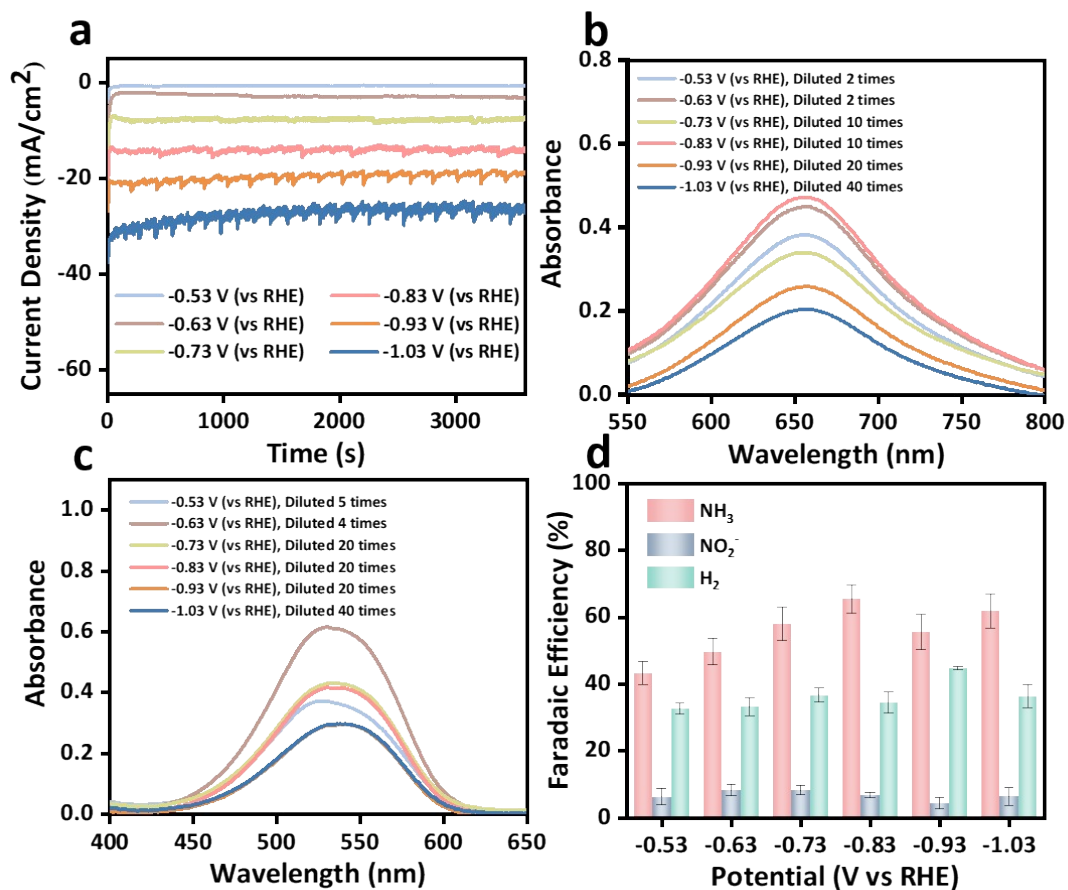

**Figure S15.** (a) Chronoamperometry curves of CDs at various potentials for 1 h in 0.1 M KOH and 0.1 M KNO<sub>3</sub>. (b) UV-Vis absorption spectra of NH<sub>4</sub><sup>+</sup> after 1 h electrolysis of CDs at various potentials. (c) UV-Vis absorption spectra of NO<sub>2</sub><sup>-</sup> after 1 h electrolysis of CDs at various potentials. (d) Potential-dependent FE<sub>NH<sub>3</sub></sub>, FE<sub>NO<sub>2</sub><sup>-</sup></sub>, and FE<sub>H<sub>2</sub></sub> over CDs.

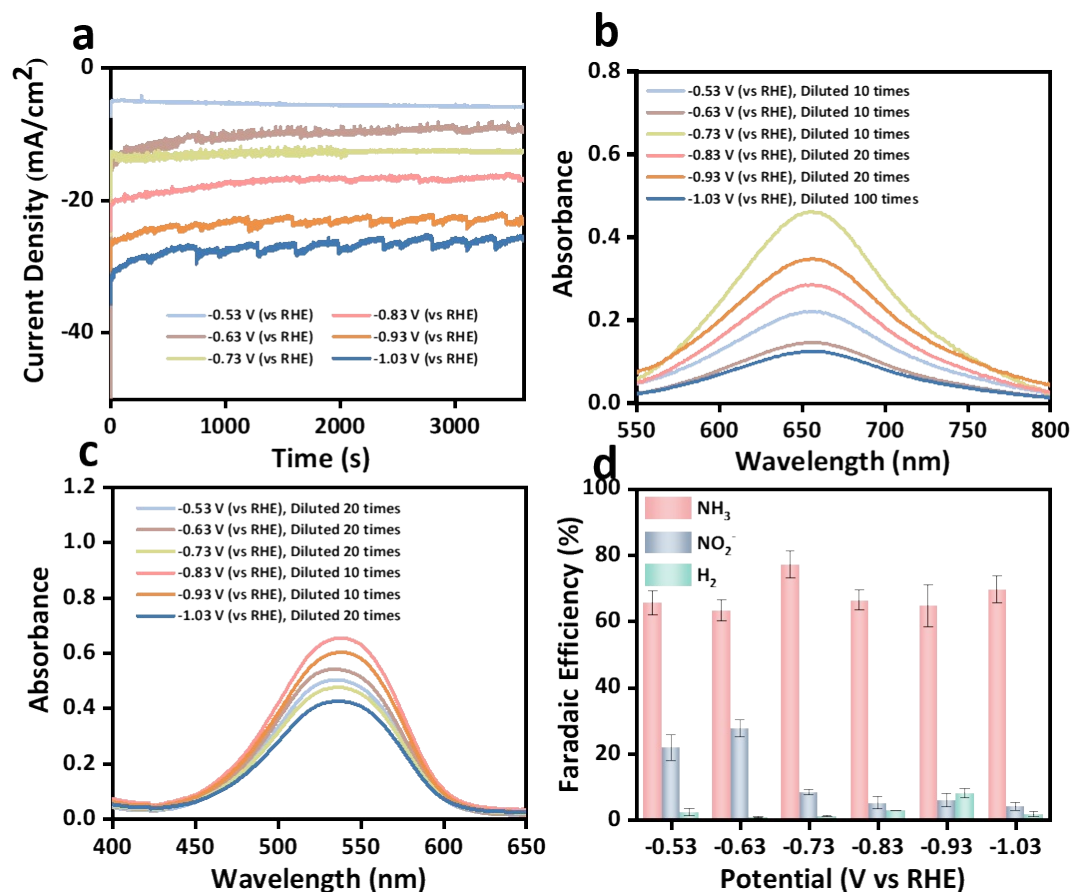

**Figure S16.** (a) Chronoamperometry curves of AgNPs at various potentials for 1 h in 0.1 M KOH and 0.1 M KNO<sub>3</sub>. (b) UV-Vis absorption spectra of NH<sub>4</sub><sup>+</sup> after 1 h electrolysis of AgNPs at various potentials. (c) UV-Vis absorption spectra of NO<sub>2</sub><sup>-</sup> after 1 h electrolysis of AgNPs at various potentials. (d) Potential-dependent FE<sub>NH<sub>3</sub></sub>, FE<sub>NO<sub>2</sub><sup>-</sup></sub> and FE<sub>H<sub>2</sub></sub> over AgNPs

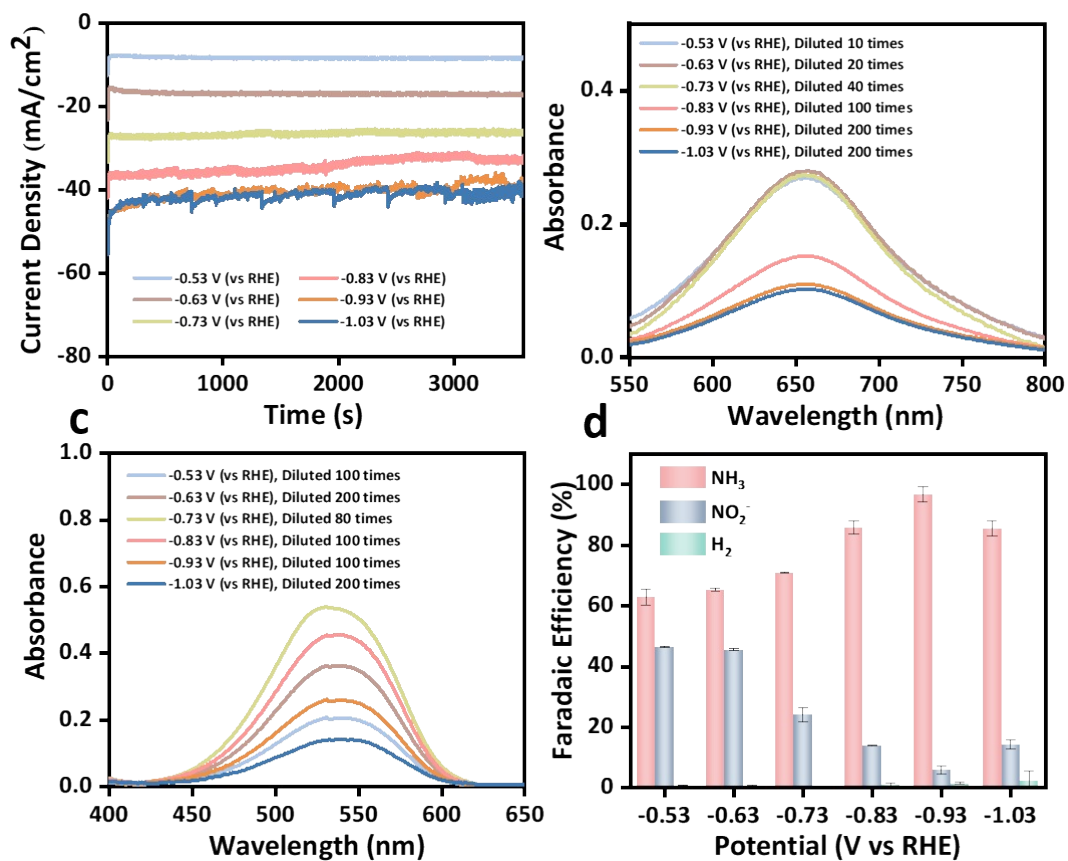

**Figure S17.** (a) Chronoamperometry curves of CD/Ag at various potentials for 1 h in 0.1 M KOH and 0.1 M KNO<sub>3</sub>. (b) UV-Vis absorption spectra of NH<sub>4</sub><sup>+</sup> after 1 h electrolysis of CD/Ag at various potentials. (c) UV-Vis absorption spectra of NO<sub>2</sub><sup>-</sup> after 1 h electrolysis of CD/Ag at various potentials. (d) Potential-dependent FE<sub>NH<sub>3</sub></sub>, FE<sub>NO<sub>2</sub><sup>-</sup></sub> and FE<sub>H<sub>2</sub></sub> over CD/Ag.

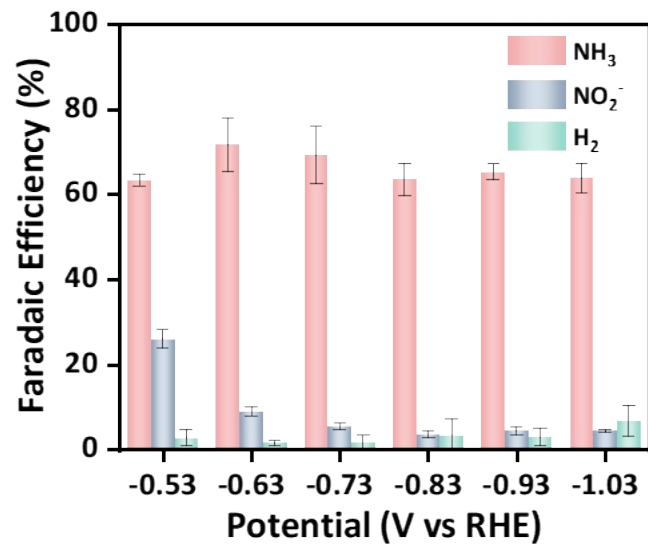

Figure S18. Potential-dependent  $\text{FE}_{\text{NH}_3}$ ,  $\text{FE}_{\text{NO}_2^-}$  and  $\text{FE}_{\text{H}_2}$  over CDs/Ag-5.

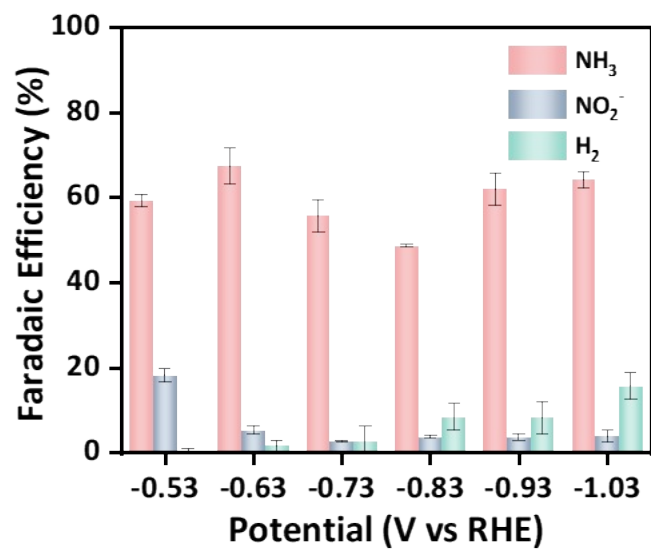

Figure S19. Potential-dependent  $FE_{NH_3}$ ,  $FE_{NO_2^-}$  and  $FE_{H_2}$  over CDs/Ag-15.

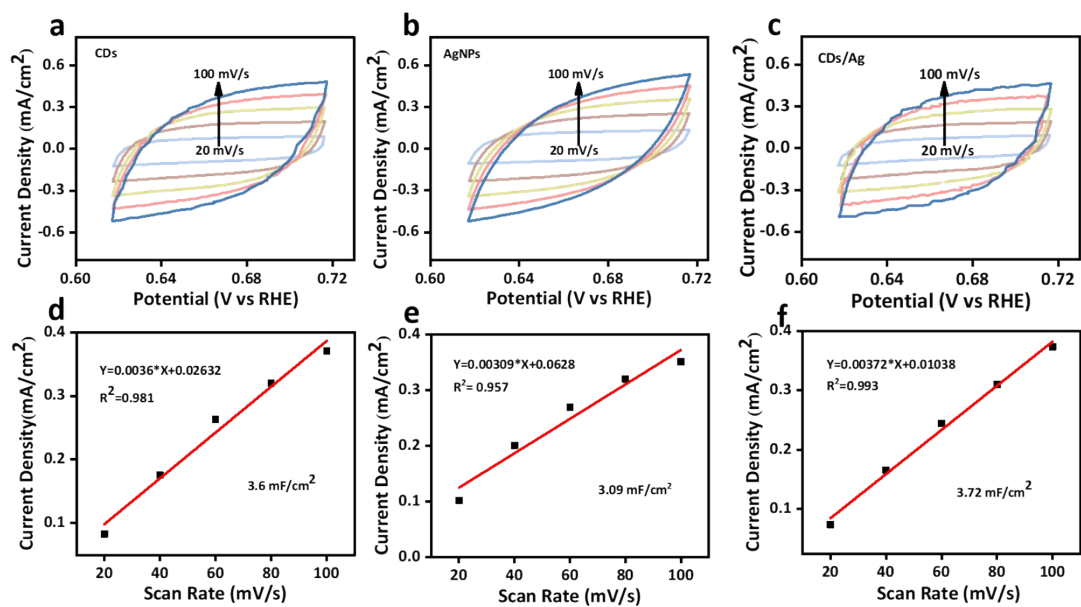

**Figure S20.** ECSA measurements of the CDs, AgNPs and CDs/Ag. (a, b, c) The cyclic voltammetry profiles obtained on the CDs, AgNPs and CDs/Ag at the sweep rates 20, 40, 60, 80, 100 mV/s, respectively. (d, e, f) The determination of double layer capacitance for each catalyst.

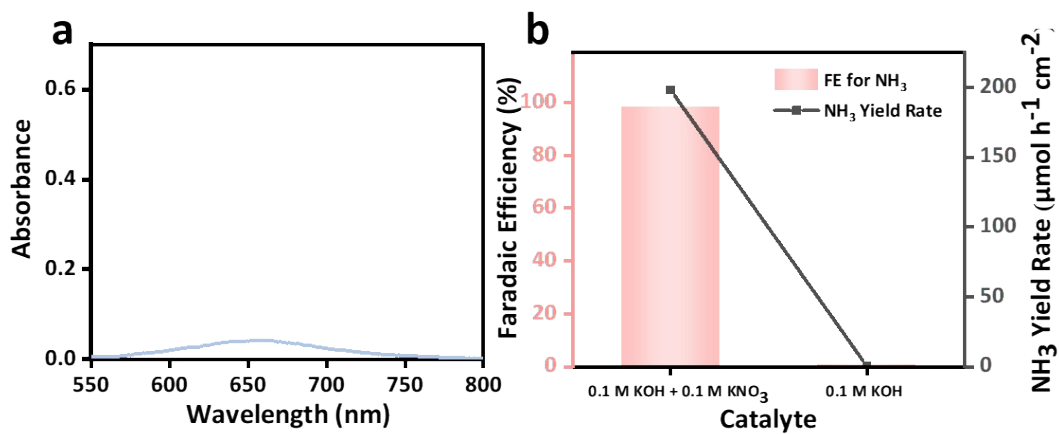

**Figure S21.** (a) UV-Vis absorption spectra of  $\text{NH}_4^+$  after 1 h electrolysis of CDs/Ag in 0.1 M KOH. (b) The  $\text{FE}_{\text{NH}_3}$  and  $\text{Y}_{\text{NH}_3}$  over CDs/Ag in 0.1 M KOH with and without 0.1 M  $\text{KNO}_3$ .



Table S1 Comparison of NO<sub>3</sub>RR performance in reported literature.

| Catalysts               | Electrolyte                                                                 | Potential (V vs RHE) | Faradaic efficiency of NH <sub>3</sub> | Yield rate of NH <sub>3</sub> (μmol h <sup>-1</sup> cm <sup>-2</sup> ) | Ref.      |
|-------------------------|-----------------------------------------------------------------------------|----------------------|----------------------------------------|------------------------------------------------------------------------|-----------|
| CDs/Ag                  | 0.1 M KOH+0.1 M KNO <sub>3</sub>                                            | -0.93                | 98.48%                                 | 198.12                                                                 | This work |
| Fe SAC                  | 0.1 M KOH+0.1 M KNO <sub>3</sub>                                            | -0.7                 | 98%                                    | 161.76                                                                 | 1         |
| PTCDA/O-Cu              | 0.1 M PBS + 500 ppm NO <sub>3</sub>                                         | -0.4                 | 85.9%                                  | 25.64                                                                  | 2         |
| Cu <sub>3</sub> P NA/CF | 0.1 M PBS + 0.1 M NaNO <sub>3</sub>                                         | -0.5                 | 91.2%                                  | 95.68                                                                  | 3         |
| Cu@CuHHTP               | 0.5 M Na <sub>2</sub> SO <sub>4</sub> +500 ppm NO <sub>3</sub> <sup>-</sup> | -0.9                 | 67.55%                                 | 108.23                                                                 | 4         |
| Cu-Pd/C nanobelts       | 0.1 M KOH+0.01 M KNO <sub>3</sub>                                           | -0.4                 | 62.3%                                  | 12.98                                                                  | 5         |
| CuOx nanoparticle s     | 0.1 M KOH+0.1 M KNO <sub>3</sub>                                            | -0.25                | 74.18%                                 | 26.41                                                                  | 6         |
| Cu/Cu <sub>2</sub> O    | 0.5 M Na <sub>2</sub> SO <sub>4</sub> +500 ppm NO <sub>3</sub> <sup>-</sup> | -0.85                | 95.8%                                  | 244.9                                                                  | 7         |
| Cu nanosheets           | 0.1 M KOH+0.01 M KNO <sub>3</sub>                                           | -0.15                | 99.7%                                  | 22.94                                                                  | 8         |
| Ir NTs                  | 0.1 M HClO <sub>4</sub> +1 M NaNO <sub>3</sub>                              | 0.06                 | 84.7%                                  | 54.17                                                                  | 9         |
| Cu-N-C SAC              | 0.1 M KOH+0.1 M KNO <sub>3</sub>                                            | -0.1                 | 84.7%                                  | 260                                                                    | 10        |

## References

- 1 P. P. Li, Z. Y. Jin, Z. W. Fang and G. H. Yu, *Energy Environ. Sci.*, 2021, **14**, 3522–3531.
- 2 Gao-Feng Chen, Yifei Yuan, Haifeng Jiang, Shi-Yu Ren, Liang-Xin Ding, Lu Ma, Tianpin Wu, Jun Lu and Haihui Wang, *Nat. Energy*, 2020, **5**, 605–613.
- 3 Jie Liang, Biao Deng, Qin Liu, Guilai Wen, Qian Liu, Tingshuai Li, Yonglan Luo, Abdulmohsen Ali Alshehri, Khalid Ahmed Alzahrani, Dongwei Ma and Xuping Sun, *Green Chem.*, 2021, **23**, 5487–5493.
- 4 Xiaojuan Zhu, Haicai Huang, Huaifang Zhang, Yu Zhang, Peidong Shi, Kaiyu Qu, Shi-Bo Cheng, An-Liang Wang and Qipeng Lu, *ACS Appl. Mater. Interfaces*, 2022, **14**, 32176–32182.
- 5 Zhe Wang, Congcong Sun, Xiaoxia Bai, Zhenni Wang, Xin Yu, Xin Tong, Zheng Wang, Hui Zhang, Haili Pang, Lijun Zhou, Weiwei Wu, Yanping Liang, Ajit Khosla and Zhenhuan Zhao, *ACS Appl. Mater. Interfaces*, 2022, **14**, 30969–30978.
- 6 Jing Geng, Sihan Ji, Hui Xu, Cuijiao Zhao, Shengbo Zhang and Haimin Zhang, *Inorg. Chem. Front.*, 2021, **8**, 5209–5213.
- 7 Yuting Wang, Wei Zhou, Ranran Jia, Yifu Yu and Bin Zhang, *Angew. Chem. Int. Ed.*, 2020, **59**, 5350–5354.
- 8 Xianbiao Fu, Xingang Zhao, Xiaobing Hu, Kun He, Yanan Yu, Tao Li, Qing Tu, Xin Qian, Qin Yue, Michael R. Wasielewski and Yijin Kan, *Appl. Mater. Today*, 2020, **19**, 100620.
- 9 Ranran Jia, Yuting Wang, Changhong Wang, Yangfang Ling, Yifu Yu and Bin Zhang, *ACS Catal.*, 2020, **10**, 3533–3540.
- 10 Ji Yang, Haifeng Qi, Anqi Li, Xiaoyan Liu, Xiaofeng Yang, Shengxin Zhang, Qiao Zhao, Qike Jiang, Yang Su, Leilei Zhang, Jian-Feng Li, Zhong-Qun Tian, Wei Liu, Aiqin Wang and Tao Zhang, *J. Am. Chem. Soc.*, 2022, **144** (27), 12062–12071.
